# Supplementary material
Source: PubMed Central journal article supplement (PMC3157187)

# Supplemental Figure 1

**A**

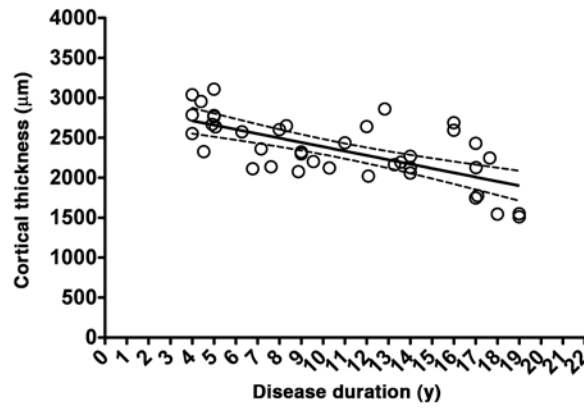

**B**

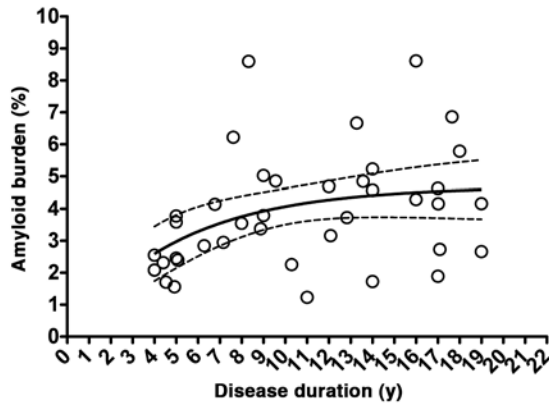

**C**

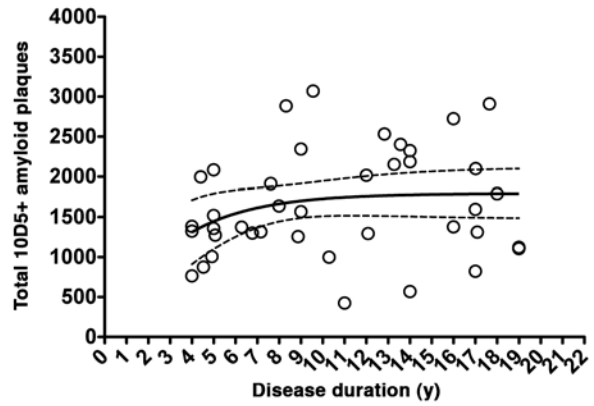

**D**

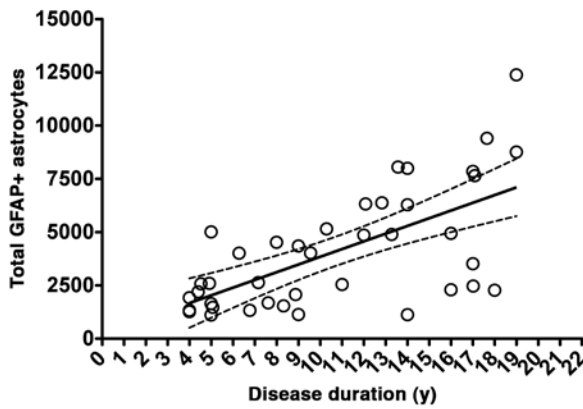

**E**

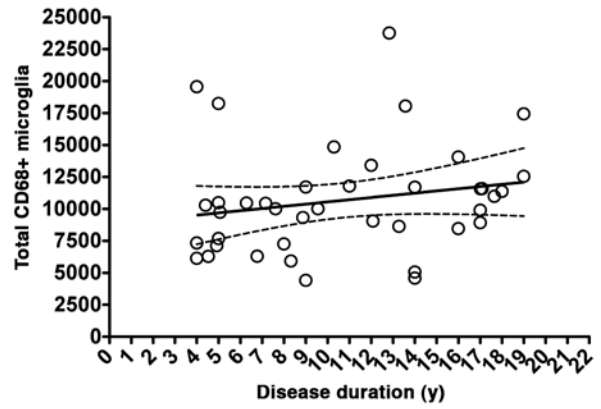

Supplement: mmc1.pdf [file mmc1.pdf]

# Supplemental Figure 2

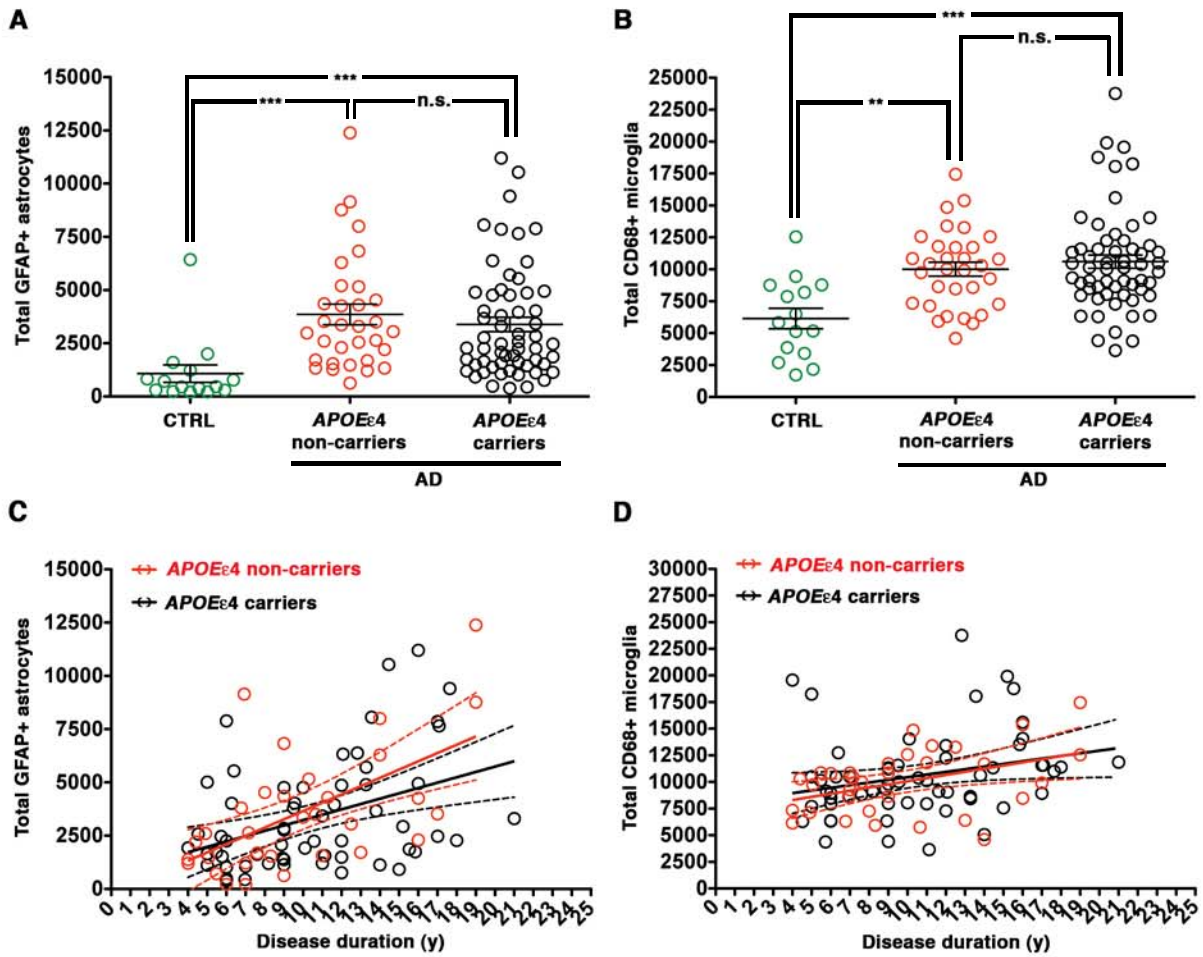

Supplement: mmc2.pdf [file mmc2.pdf]
